# Supplementary material for: A Lewis acid–base paired InBO3 catalyst: synthesis and high selectivity for isopropanol dehydrogenation
Source: Royal Society of Chemistry journal article supplement (doi:10.1039/d3dt00941f), 2023-01-01
Supplement: d3dt00941f1.pdf [file d3dt00941f1.pdf]

Supporting Information for

A Lewis acid-base paired  $\text{InBO}_3$  catalyst: synthesis and high  
selectivity for isopropanol dehydrogenation

*Yurong Sun,<sup>ab</sup> Wenliang Gao,<sup>ab\*</sup> Tao Yang<sup>ab\*</sup>*

<sup>a</sup> College of Chemistry and Chemical Engineering, Chongqing University, Chongqing

401331, People's Republic of China

<sup>b</sup> Chongqing Key Laboratory of Theoretical and Computational Chemistry, Chongqing

University, Chongqing 401331, People's Republic of China

\*E-mails: [gaowl@cqu.edu.cn](mailto:gaowl@cqu.edu.cn); [taoyang@cqu.edu.cn](mailto:taoyang@cqu.edu.cn)

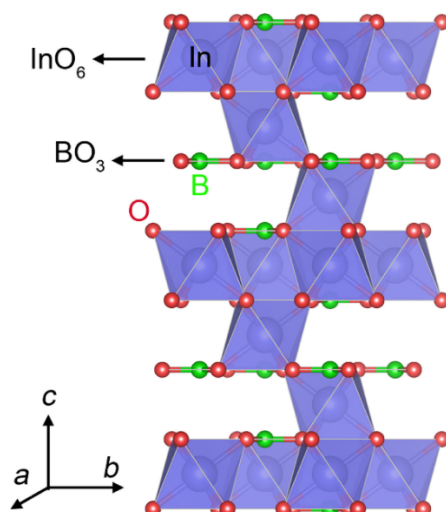

Fig. S1. Structure view of  $\text{InBO}_3$ .

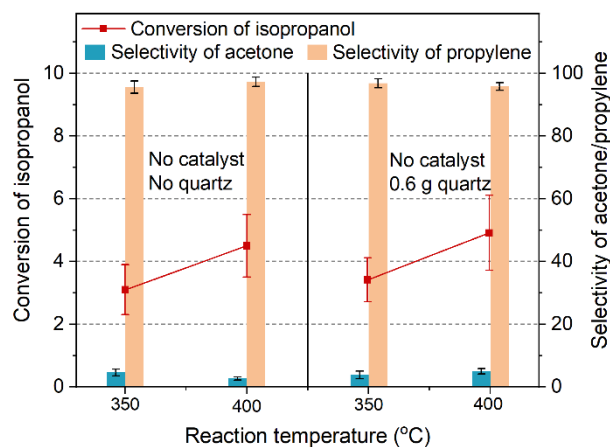

Fig. S2. Catalytic isopropanol conversion and selectivity of products in blank experiments.

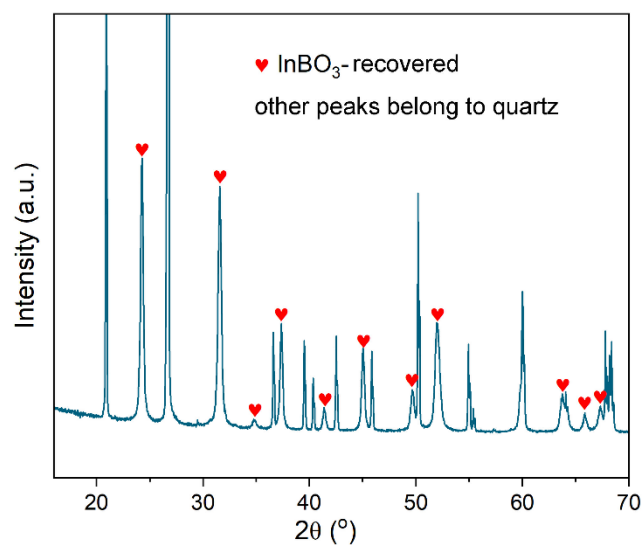

Fig. S3. Powder XRD pattern for recovered solid catalyst. The peaks for  $\text{InBO}_3$  are highlighted and the remaining peaks belong to the additive quartz.
